# Supplementary material
Source: Elsevier journal article supplement (https://www.sciencedirect.com/science/article/pii/S2530064420300390)
Supplement: mmc1 [file S2530064420300390:mmc1.docx]

Perspectives in Ecology and Conservation

**Appendix A.**

**Supplementary material**

**Unravelling effects of grazing intensity on genetic diversity and fitness of desert vegetation**

**Pelliza, Y.I., Souto, C.P. and Tadey, M.**

**Table A. 1**

Studied rangelands’ details. Including name, area (in hectares, Ha), herbivore composition, mean dung density (dung number/plot m2), stocking history (number of years used for livestock breeding), Valentine´s stocking rate (AU x Year Ha-1, modified from Valentine, 2001) *Valentine (2001) equivalences: 1 cow = 1 LU; 1 horse = 0.65 LU; 1 goat = 0.1 LU; 1 sheep = 0.1 LU) and FAO´s stocking rate (LU x Year Ha-1, following FAO, 2011) *FAO (2011) equivalences: 1 cow = 0.7 LU; 1 horse = 0.65 LU; 1 goat = 0.1 LU; 1 sheep = 0.1 LU.

| Name | Area  (Ha) | Herbivore composition | Mean  dung density | Stocking history | Valentine ´s Stocking rate | FAO´s Stocking rate* |
| --- | --- | --- | --- | --- | --- | --- |
| MB | 25,000 | Cows and horses | 0.028 | 30 | 0.060 | 0.036 |
| BU | 7,500 | Horses | 0.035 | 30 | 0.075 | 0.039 |
| C1 | 94 | Horses and sheep | 0.046 | 10 | 0.107 | 0.055 |
| CA | 94 | Cows, horses, goats and sheep | 0.046 | 30 | 0.117 | 0.071 |
| GUE | 3,500 | Cows and horses | 0.032 | 10 | 0.132 | 0.084 |
| LP | 4,500 | Cow goats and sheep | 0.046 | 10 | 0.212 | 0.095 |
| AMO | 550 | Cow goats and sheep | 0.057 | 10 | 0.631 | 0.347 |
| ADA | 970 | Cows and horses | 0.035 | 10 | 0.696 | 0.417 |
| HL | 7,500 | Cows, horses and goats | 0.086 | 30 | 0.924 | 0.623 |
| MA | 5,000 | Cows, horses and sheep | 0.057 | 30 | 1.632 | 1.1052 |

**Table A. 2**

Mean (± SE) genetic parameters of *Prosopis alpataco* for each rangeland. Genetic parameters evaluated were: *A* = average number of alleles, *Ae* = number of effective alleles, *Ho* = observed heterozygosity, *He* = expected heterozygosity, *Fis* = inbreeding index, %*P* = percentage of polymorphic loci. Bold letters represent statistically significant *P*-values. Stocking levels are as follow: L = Low, I = intermediate and H = high.

| Rangeland | Stocking level | Cohort | Stocking rate | *A* ± SE | *Ae* ± SE | *Ho* ± SE | *He* ± SE | *Fis* ± SE | *%P* |
| --- | --- | --- | --- | --- | --- | --- | --- | --- | --- |
| MB | L | Parental | 0.06 | 2.50 ± 0.27 | 1.76 ± 0.13 | 0.47 ± 0.07 | 0.40 ± 0.06 | -0.09 ± 0.05 | 87.5% |
| MB | L | Offspring | 0.06 | 2.75 ± 0.25 | 1.48 ± 0.12 | 0.16 ± 0.04 | 0.29 ± 0.06 | 0.22 ± 0.13 | 100.0% |
| BU | L | Parental | 0.075 | 2.25 ± 0.16 | 1.53 ± 0.07 | 0.32 ± 0.04 | 0.34 ± 0.03 | 0.06 ± 0.10 | 100.0% |
| BU | L | Offspring | 0.075 | 2.00 ± 0.33 | 1.04 ± 0.17 | 0.10 ± 0.03 | 0.12 ± 0.05 | 0.17 ± 0.06 | 87.5% |
| C1 | I | Parental | 0.107 | 2.38 ± 0.42 | 2.02 ± 0.31 | 0.27 ± 0.09 | 0.38 ± 0.11 | 0.28 ± 0.08 | 62.5% |
| C1 | I | Offspring | 0.107 | 2.38 ± 0.26 | 1.18 ± 0.05 | 0.10 ± 0.04 | 0.14 ± 0.04 | 0.34 ± 0.13 | 87.5% |
| CA | I | Parental | 0.117 | 2.12 ± 0.58 | 1.34 ± 0.33 | 0.29 ± 0.09 | 0.29 ± 0.09 | 0.14 ± 0.08 | 62.5% |
| CA | I | Offspring | 0.117 | 2.12 ± 0.23 | 1.20 ± 0.06 | 0.16 ± 0.04 | 0.15 ± 0.04 | 0.05 ± 0.03 | 87.5% |
| GUE | I | Parental | 0.132 | 2.62 ± 0.26 | 1.79 ± 0.21 | 0.34 ± 0.05 | 0.39 ± 0.07 | 0.14 ± 0.10 | 87.5% |
| GUE | I | Offspring | 0.132 | 2.37 ± 0.18 | 1.27 ± 0.11 | 0.22 ± 0.11 | 0.18 ± 0.05 | -0.18 ± 0.17 | 100.0% |
| LP | I | Parental | 0.212 | 1.87 ± 0.23 | 1.46 ± 0.13 | 0.28 ± 0.07 | 0.27 ± 0.07 | -0.01 ± 0.11 | 75.0% |
| LP | I | Offspring | 0.212 | 2.25 ± 0.37 | 1.42 ± 0.19 | 0.21 ± 0.08 | 0.22 ± 0.08 | 0.09 ± 0.05 | 62.5% |
| AMO | H | Parental | 0.631 | 2.12 ± 0.29 | 1.64 ± 0.19 | 0.27 ± 0.07 | 0.33 ± 0.08 | 0.14 ± 0.05 | 75.0% |
| AMO | H | Offspring | 0.631 | 2.50 ± 0.33 | 1.56 ± 0.22 | 0.25 ± 0.10 | 0.29 ± 0.08 | 0.19 ± 0.17 | 75.0% |
| ADA | H | Parental | 0.696 | 2.00 ± 0.27 | 1.63 ± 0.17 | 0.31 ± 0.07 | 0.33 ± 0.08 | 0.09 ± 0.09 | 75.0% |
| ADA | H | Offspring | 0.696 | 2.50 ± 0.33 | 1.70 ± 0.19 | 0.27 ± 0.09 | 0.35 ± 0.08 | 0.25 ± 0.12 | 75.0% |
| HL | H | Parental | 0.924 | 2.12 ± 0.35 | 1.63 ± 0.24 | 0.28 ± 0.09 | 0.29 ± 0.10 | 0.06 ± 0.08 | 62.5% |
| HL | H | Offspring | 0.924 | 2.12 ± 0.23 | 1.18 ± 0.04 | 0.15 ± 0.03 | 0.14 ± 0.03 | 0.18 ± 0.04 | 87.5% |
| MA | H | Parental | 1.632 | 1.62 ± 0.32 | 1.26 ± 0.13 | 0.15 ± 0.08 | 0.15 ± 0.07 | 0.004 ± 0.12 | 37.5% |
| MA | H | Offspring |  | na | na | na | na | na | na |

**Table A.3**

Parental parameters as fitness proxies. For each Rangeland (name) and Stocking Rate (AU x Year Ha-1) the summary of the mean (± SE) of Browsing Index, Height (m), Diameter (m), Seed Set, Seed weight and Seedling Emergence of *Prosopis alpataco*.

| Rangeland | Stocking rate | Browsing (SE) | Height (SE) | Diameter (SE) | Seed set (SE) | Seed weight (SE) | Emergence (SE) |
| --- | --- | --- | --- | --- | --- | --- | --- |
| MB | 0.060 | 0.76 (0.04) | 1.01 (0.08) | 2.56 (0.30) | 1.00 (0.00) | 0.23 (0.05) | 0.78 (0.05) |
| BU | 0.075 | 0.53 (0.06) | 1.05 (0.05) | 2.85 (0.22) | 1.00 (0.00) | 0.16 (0.07) | 0.80 (0.07) |
| C1 | 0.108 | 0.86 (0.02) | 1.04 (0.07) | 2.65 (0.20) | 0.94 (0.02) | 0.16 (0.03) | 0.49 (0.03) |
| CA | 0.117 | 0.39 (0.06) | 0.60 (0.04) | 2.68 (0.26) | 1.00 (0.00) | 0.09 (0.04) | 0.88 (0.04) |
| GUE | 0.132 | 0.68 (0.06) | 1.06 (0.05) | 3.40 (0.25) | 1.00 (0.00) | 0.09 (0.05) | 0.82 (0.05) |
| LP | 0.212 | 0.83 (0.03) | 0.77 (0.05) | 2.72 (0.32) | 0.48 (0.03) | 0.47 (0.06) | 0.85 (0.06) |
| AMO | 0.631 | 0.67 (0.05) | 0.90 (0.06) | 2.65 (0.23) | 0.50 (0.07) | 0.08 (0.12) | 0.58 (0.12) |
| ADA | 0.696 | 0.51 (0.06) | 0.84 (0.05) | 3.40 (0.31) | 0.71 (0.07) | 0.08 (0.05) | 0.64 (0.05) |
| HL | 0.924 | 0.80 (0.05) | 0.56 (0.07) | 2.23 (0.43) | 1.00 (0.00) | 0.16 (0.03) | 0.85 (0.03) |
| MA | 1.632 | 0.78 (0.05) | 0.90 (0.11) | 2.19 (0.22) | 0.080 | 0.010 | na |
| Total |  | 0.67 (0.30) | 0.87 (0.06) | 2.73 (0.27) | 0.77 (0.02) | 0.17 (0.06) | 0.74 (0.06) |

**Table A. 4**

Models used to estimate the parameters of the path analysis (Fig.1b). Variables names are as follow: SM = seedling mortality, SR= stocking rate, OG= Genetic dimension extracted from X AXIS of a PCA including genetic parameters of offspring cohort, PG= Genetic dimension extracted from X AXIS of a PCA including genetic parameters of parental cohort, PF= fitness dimension extracted from X AXIS of a PCA including fitness parameters for parental cohort.

| Path | Path models | β | *P* |
| --- | --- | --- | --- |
| 1 | lm (PG ~ SR ) | -0.27 | 0.034 |
| 2 | lme (PF ~ SR, random=~1|rangeland/individual) | -1.27 | 0.022 |
| 3 | lme (PF ~ PG) | 0.1 | 0.070 |
| 4 | lme (OG ~ PG, random=~ 1|rangeland/individual) | -0.11 | 0.080 |
| 5 | lm (OG ~ PF) | -0.35 | 0.002 |
| 6 | glm (SM ~ OG, family = Binomial (link = "logit")) | -0.34 | 0.050 |

**Table A. 5**

Claims testing the patterns of dependence-independence among variables *sensu* Fig. 1b used to estimate the BU basis (Shipley, 2009). Variables names are as follow: SM= seedling mortality, SR= stocking rate, OG= Genetic dimension extracted from X AXIS of a PCA including genetic parameters of offspring cohort, PG= Genetic dimension extracted from X AXIS of a PCA including genetic parameters of parental cohort, PF= fitness dimension extracted from X AXIS of a PCA including fitness parameters for parental cohort.

| D-sep claims | Variable whose partial regression slope should be zero | Tested claims | Null probability distribution | *P* |
| --- | --- | --- | --- | --- |
| SM,SR|OG | SM | claim1= glmer(SM ~ SR + OG + (1|rangeland/individual)) | Binomial (link = "logit") | 0.81 |
| SM,PG|OG | SM | claim2 = glm(SM ~ PG + OG ) | Binomial (link = "logit") | 0.74 |
| SM,PF|OG | SM | claim3 = glm(SM ~ PF + OG) | Binomial (link = "logit") | 0.26 |
| OG,SR|PF,PG | OG | claim4 = lme (OG ~ SR + PF + PG, random=~ 1|rangeland/individual) | Normal | 0.90 |

**Table A. 6**

Neutrality tests for 8 isozyme loci in 19 populations *Prosopis alpataco* in Patagonian Monte Desert. The statistics were calculated using the Ewens-Watterson Test for Neutrality (Manly, 1985) and were estimated using 1,000 simulations samples in the POPGENE ver 1.31 (Yeh et al., 1999) program. *L95* and *U95*, which are the lower and upper limits of the 95% confidence interval of Nul F, respectively. If *Obs.F* is within this confidence interval, the locus is neutral; otherwise, it is not.

| *Locus* | *n* | *k* | *Obs. F* | *Min F* | *Max F* | *Mean** | *SE** | *L95** | *U95** |
| --- | --- | --- | --- | --- | --- | --- | --- | --- | --- |
| Mdh2 | 50 | 3 | 0.5096 | 0.3333 | 0.9232 | 0.6351 | 0.0272 | 0.3576 | 0.9224 |
| Me2 | 6 | 1 | 1.0000 | 1.0000 | 1.0000 | **** | **** | **** | **** |
| Me3 | 50 | 3 | 0.5816 | 0.3333 | 0.9232 | 0.6243 | 0.0272 | 0.3624 | 0.9224 |
| Percat2 | 50 | 2 | 0.6152 | 0.5000 | 0.9608 | 0.7870 | 0.0264 | 0.5032 | 0.9608 |
| Pgm | 28 | 3 | 0.5944 | 0.3333 | 0.8673 | 0.5876 | 0.0237 | 0.3571 | 0.8648 |
| Pgi2 | 16 | 2 | 0.5078 | 0.5000 | 0.8828 | 0.7133 | 0.0203 | 0.5000 | 0.8828 |
| Pgi3 | 42 | 3 | 0.4501 | 0.3333 | 0.9093 | 0.6165 | 0.0279 | 0.3481 | 0.9082 |
| Per2 | 50 | 3 | 0.5256 | 0.3333 | 0.9232 | 0.6237 | 0.0301 | 0.3496 | 0.9224 |

**Fig. A.1**

Map of the studied area. Rangelands location (yellow dots with the rangeland name) in Patagonian Monte Desert, Neuquén province, Patagonia, Argentina. The number near each rangeland name depicts the order of increasing stocking rate (from 0.06 (1) to 1.6 AU x Year Ha-1 (10)).

**Fig A. 2**

Change in genetic diversity between parental and offspring cohorts across grazing gradient. Delta genetic variation was calculated for each genetic variable using the following equation: *ΔGV =* 1- parental GV /offspring GV. D*A*= Change of the number of alleles (*A*). D*Ae*= Change of the number of alleles (*Ae*). D*He*= Change of the expected heterozygosity (*He*). Negative values of *ΔGV* represent loss of genetic diversity from parental to offspring cohort*.*

**Fig. A. 3**

F-statistics among stocking levels comparing parental (black circle) and offspring (grey circle) cohorts. The figure shows mean ± CI (confidence intervals) for each stocking level: **A**. Total endogamy (FIT); **B**. Divergence between rangelands (FIT); **C**. Inbreeding (FIS).

**Fig. A. 4**

Scatterplot showing in the X-AXIS the PCA scores of parental genetic parameters and Y-AXIS the PCA scores of offspring genetic parameters. PCA were obtained using genetic parameters (*Individual heterozygosity* and *allelic diversity*) estimated for each population, separately. Only the first axis of each PCA was used here, as they explained more than 80% of the variance.
